# Supplementary material for: Signaling pathways activation profiles make better markers of cancer than expression of individual genes
Source: PubMed Central journal article supplement (PMC4259415; doi:10.18632/oncotarget.2548), 2014-08-23

SUPPLEMENTARY DATA

Supplementary Dataset 3: Pathway Activation Strength (PAS) for the investigated cancer types profiled for 82 human intracellular signaling pathways. Average PAS scores are shown for each cancer type.

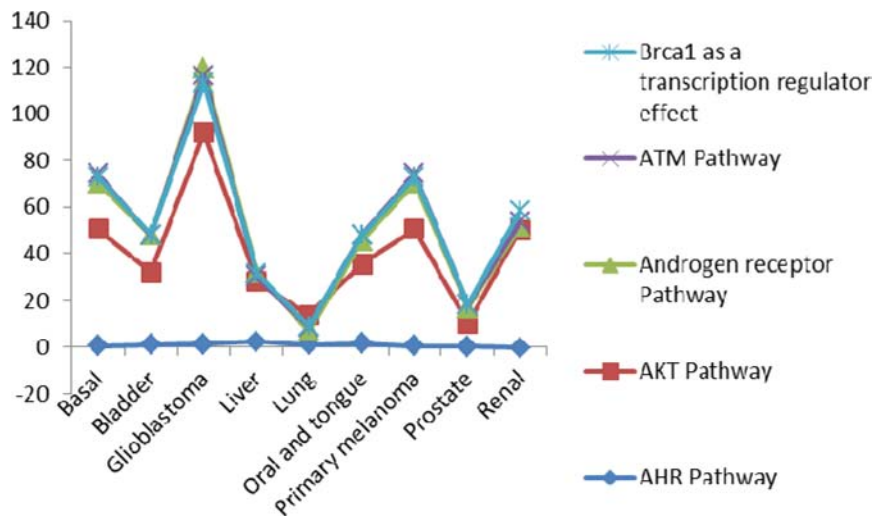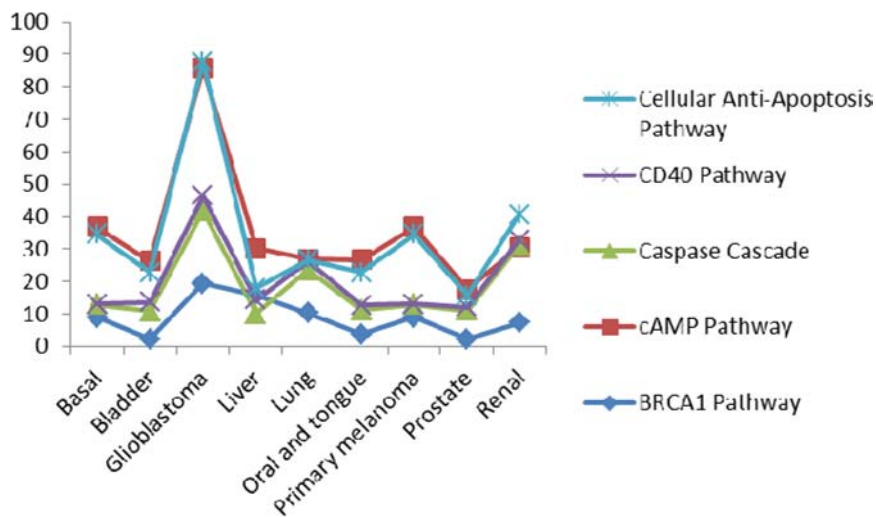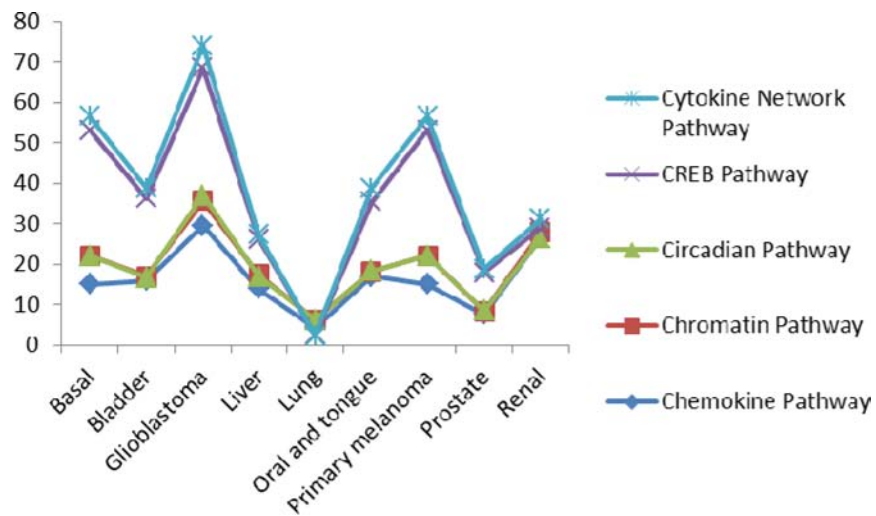

(Continued)

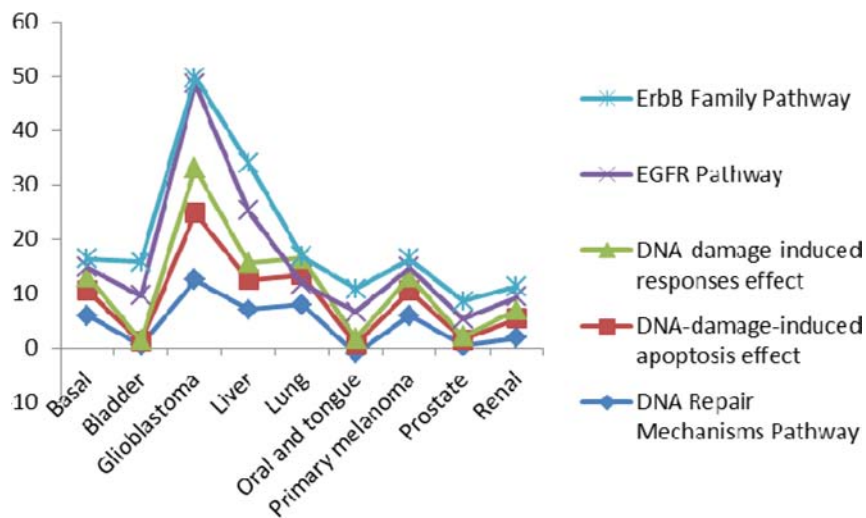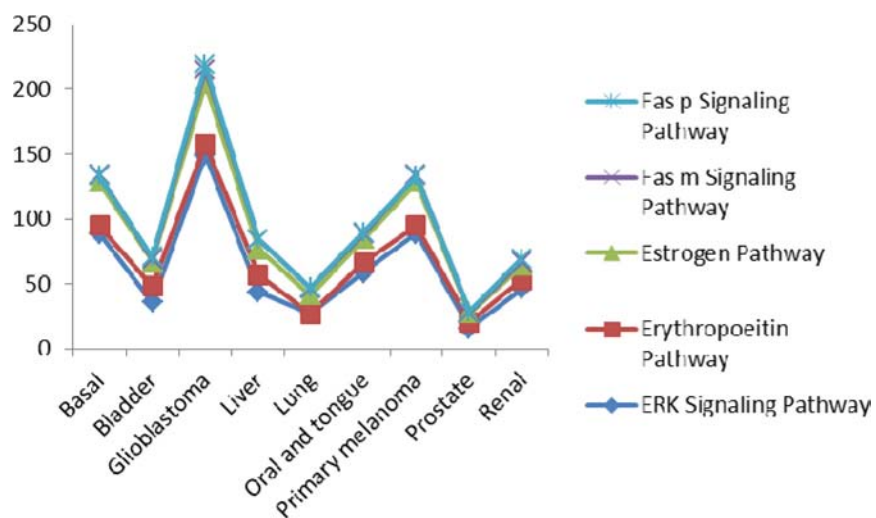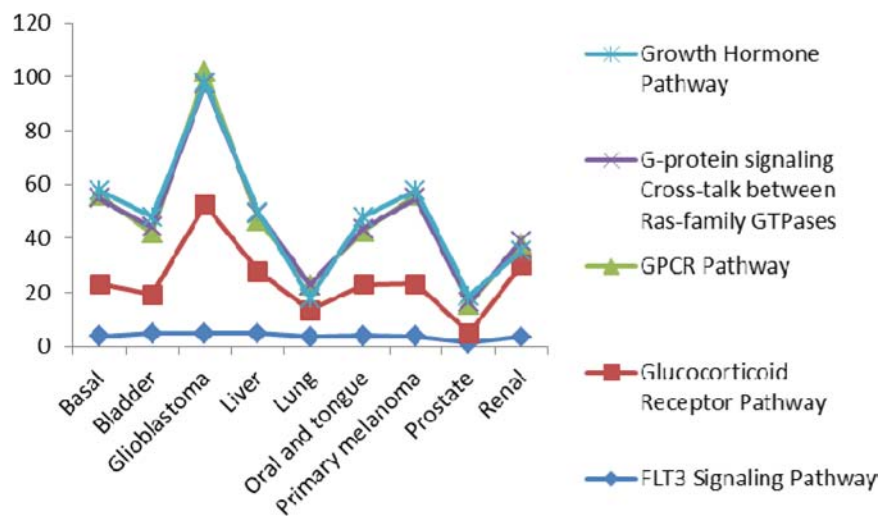

(Continued)

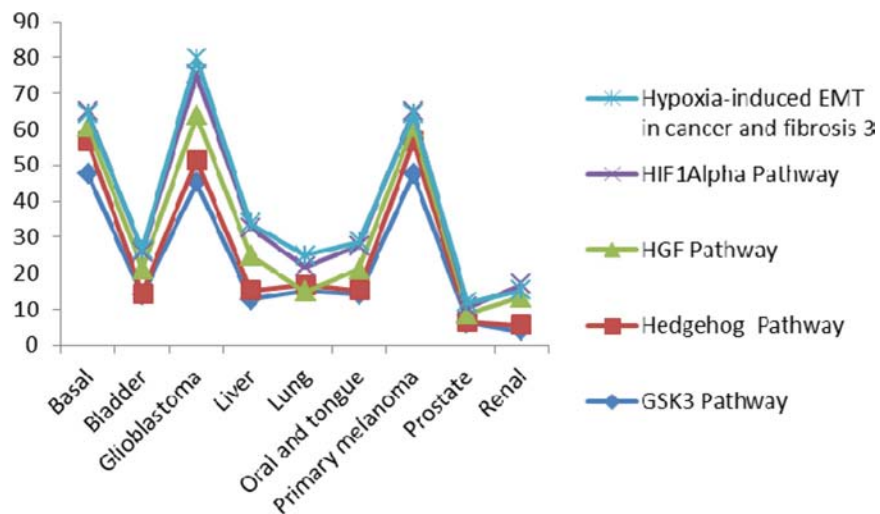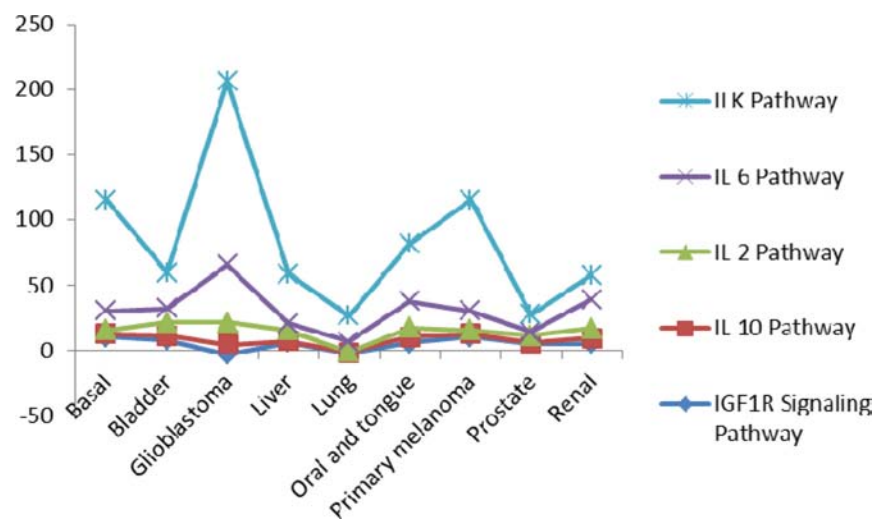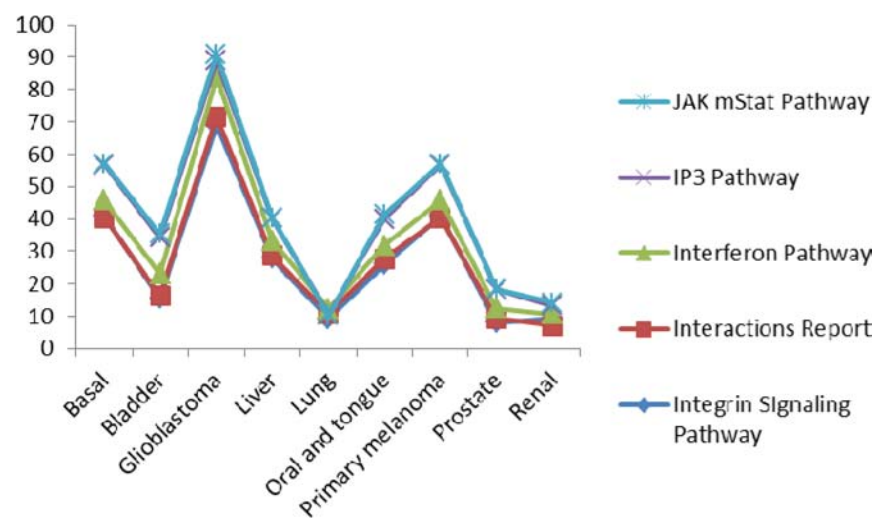

(Continued)

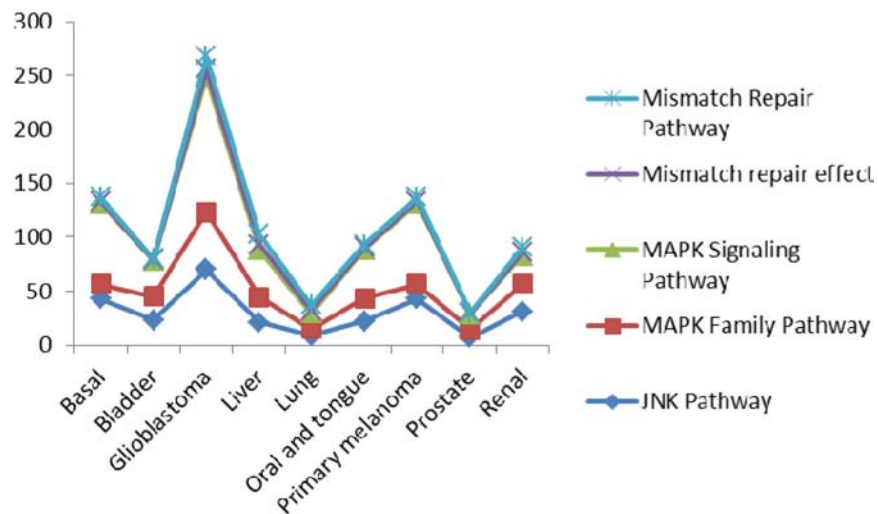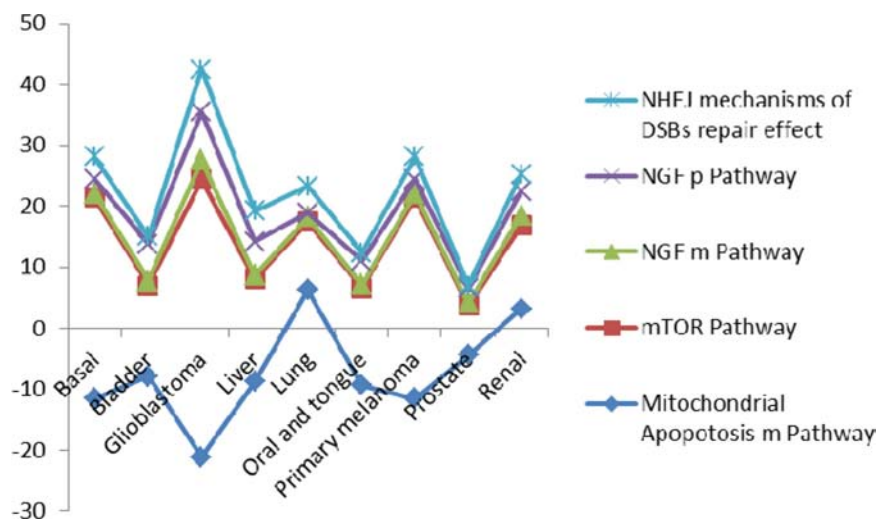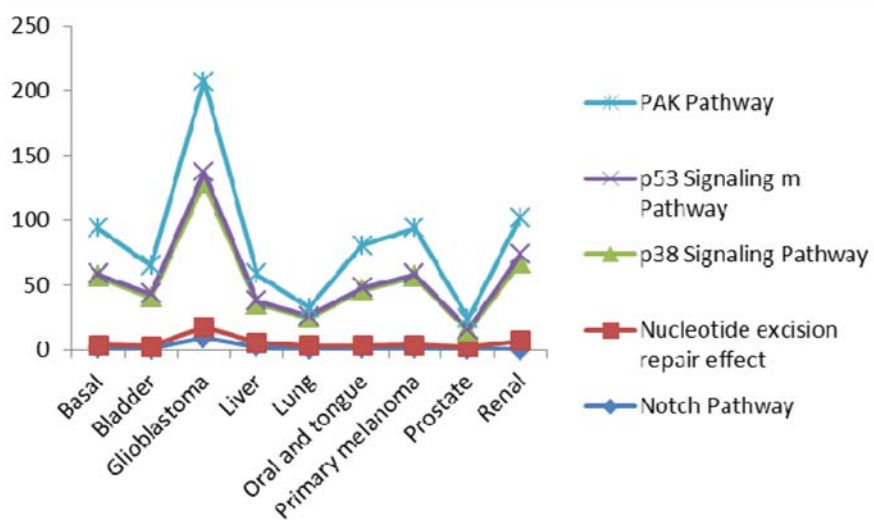

(Continued)

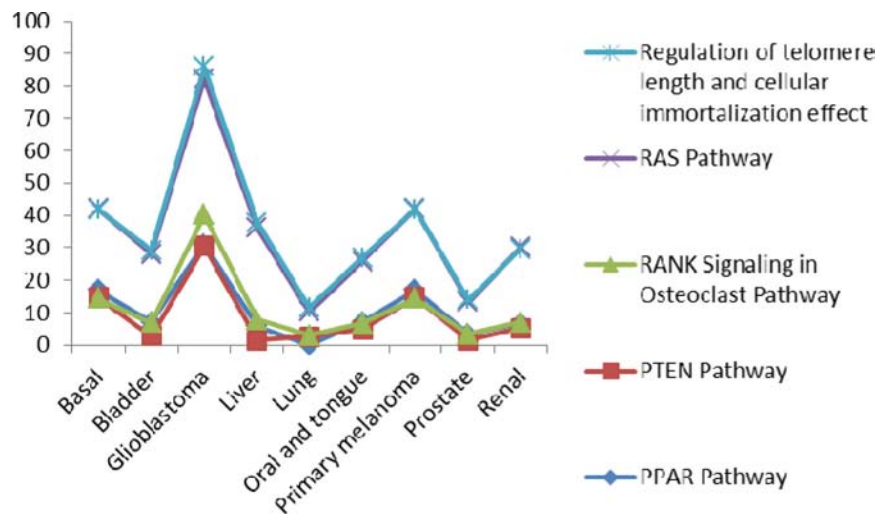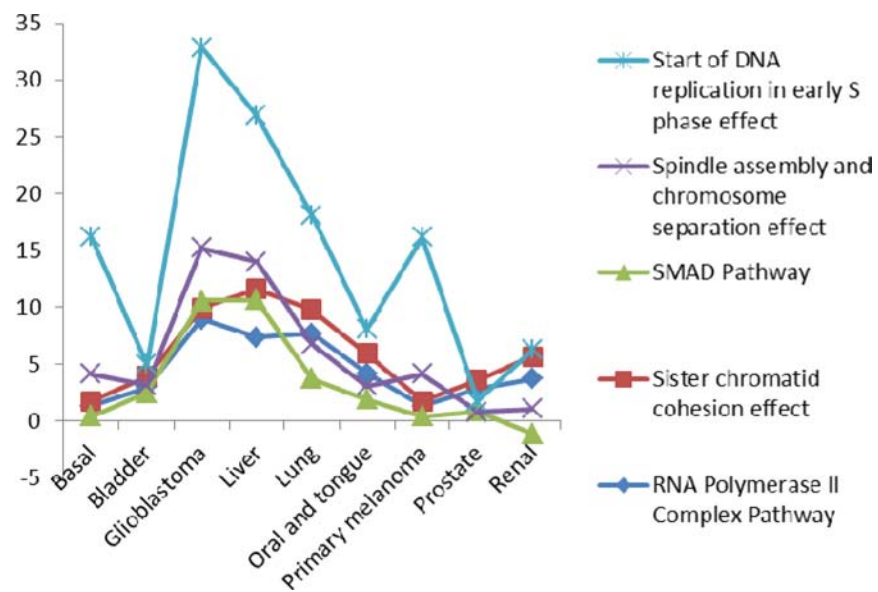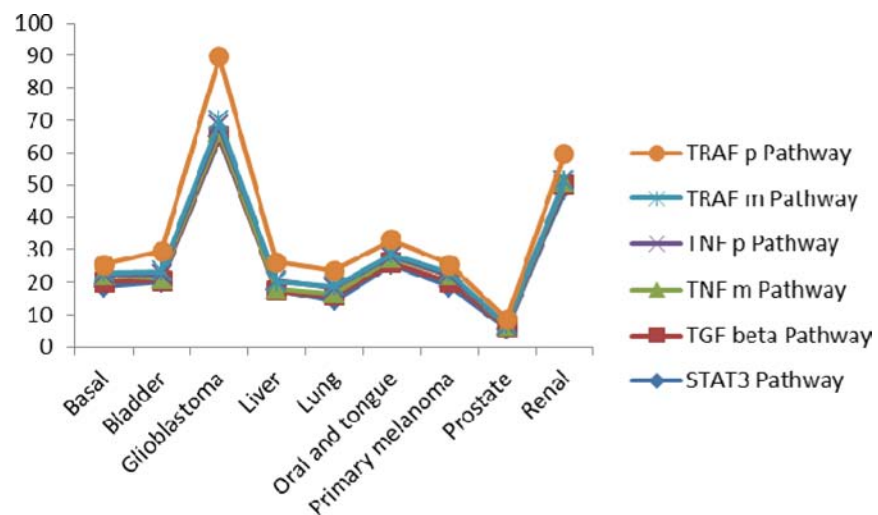

(Continued)

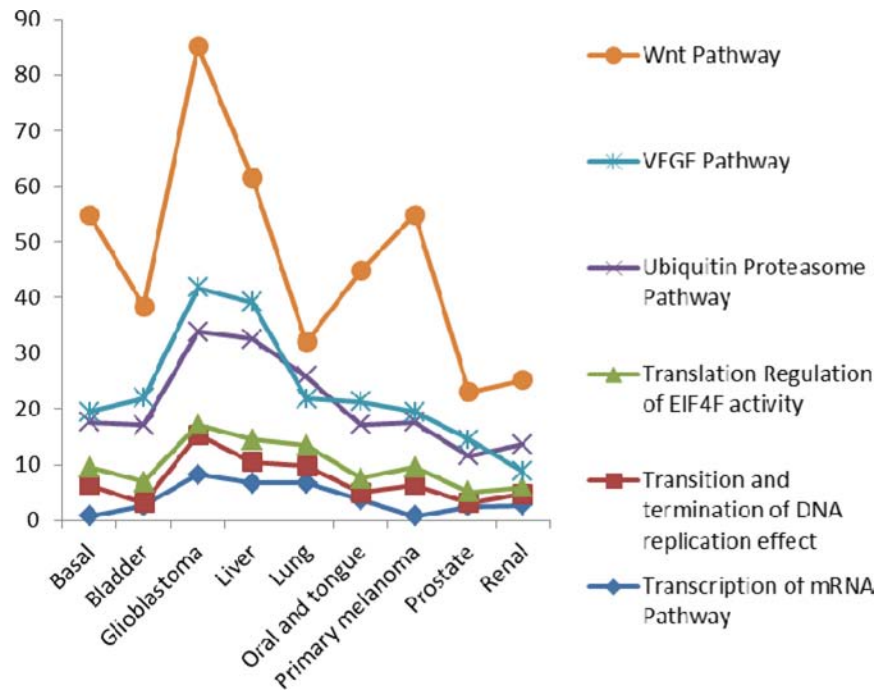

Supplement: oncotarget-05-10198-s001.pdf [file oncotarget-05-10198-s001.pdf]
